# Supplementary material for: Genome sequence-based identification of bacteria nodulating Mimosa pudica growing in Eastern Himalayas and Western Ghats of India and description of Cupriavidus mimosae sp. nov. and Cupriavidus gehlotii sp. nov
Source: Research Square preprint supplement (doi:10.21203/rs.3.rs-5391658/v1), 2024-11-19
Supplement: Supplementary file 1 [file c83c02792523afd1f882f848.docx]

**Supplementary Data**

**Genome sequence-based identification of bacteria nodulating *Mimosa pudica* growing in Eastern Himalayas and Western Ghats of India and description of *Cupriavidus mimosae* sp. nov. and** ***Cupriavidus gehlotii* sp. nov.**

**Lekha Sharma1, Mitesh Khairnar2, Aabeejjeet Pansare2, Krishna Mohan Medicherla3, Girish K Goswami4, Praveen Rahi5***

1C U Shah University, Wadhwan City, Surendranagar. Gujarat - 363030, India

2National Centre for Microbial Resource, National Centre for Cell Science, Pune-411007, India

3Birla Institute of Scientific Research, Jaipur-302001, Rajasthan, INDIA

4Regional Science Centre Bhavnagar, GUJCOST, DST, Govt of Gujarat- 364004 India

5Collection of Institut Pasteur (CIP), Institut Pasteur, Université Paris Cité, Paris-75015, France

***Corresponding Authors:**

Praveen Rahi

Collection of Institut Pasteur (CIP),

Institut Pasteur, Université Paris Cité,

Paris-75015, France

[prahi@pasteur.fr](mailto:prahi@pasteur.fr)


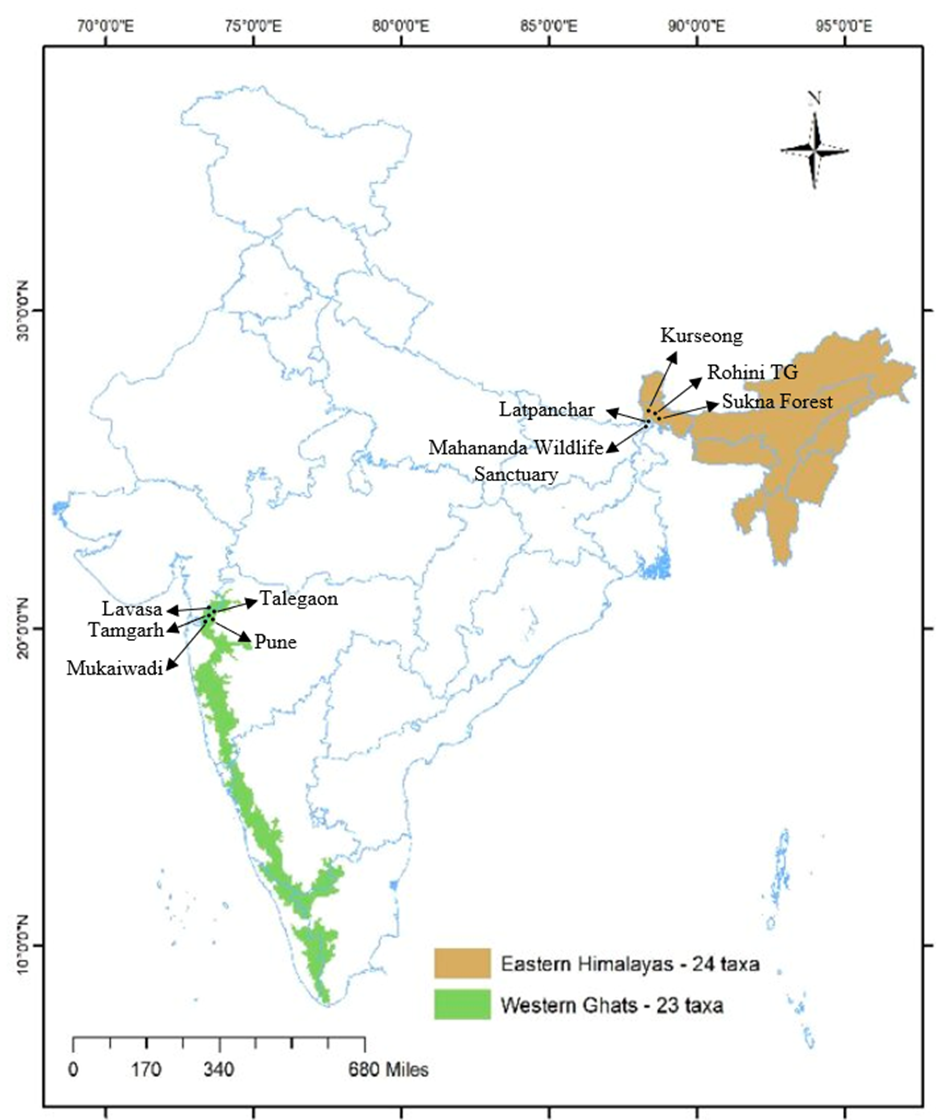


Figure S1. Map showing the collection site locations of *Mimosa pudica* from Eastern Himalayan (EH) region and Western Ghat (WG) region

Table S1. Geographical locations from where samples were collected.

| S.No | Geographical location | Site name | No of samples | Soil texture | Strain code | Altitude (ft) | Latitude | Longitude |
| --- | --- | --- | --- | --- | --- | --- | --- | --- |
| 1. | EH | Sukna, West Bengal | 2 | Sandy loam | SKND1 & SKND2 | 5010 | 26.7917°N | 88.3624°E |
| 2. | EH | Mahananda WL San, West Bengal | 2 | Sandy loam | SKND3 & SKND5 | 2000 | 26.2852°N | 88.1550°E |
| 3. | EH | Latpanchar, West Bengal | 2 | Sandy loam | SKND4 &  SKND6 | 4200 | 26.9159°N | 88.4028°E |
| 4 | EH | Kurseong, West Bengal | 2 | Sandy loam | SKND7 & SKND8 | 4900 | 26.5240°N | 88.1638°E |
| 5 | EH | Rohini TG, west Bengal | 2 | Sandy loam | SKND9 & SKND10 | 4400 | 26.8434°N | 88.2896°E |
| 6 | WG | Talegaon, Maharashtra | 3 | Clay loamy | WGtg1, WGtg2 & WGtg3 | 2200 | 18.7216°N | 73.6823°E |
| 7 | WG | Mukaiwadi, Maharashtra | 5 | Clay loamy | WGmk1, 2, 3, 4 & 5 | 2500 | 18.41°N | 73.4048°E |
| 8 | WG | Tamgarh, Maharashtra | 5 | Clay loamy | WGtm1, 2, 3, 4 & 5 | 1806 | 18.5040°N | 73.5146°E |
| 9 | WG | Lavasa, Maharashtra | 3 | Clay loamy | WGlv1, WGlv2 & WGlv3 | 2600 | 18.4052°N | 73.5062°E |
| 10 | WG | Pune, Maharashtra | 3 | Clay loamy | WGpn1, WGpn2 & WGpn3 | 1840 | 18.3113°N | 73.5124°E |

Note: EH=Eastern Himalayan; WG= Western Ghat; WL=Wildlife sanctuary.

Table S2: Isolates identified at genus or species level with different score values using MALDI-TOF MS-based biotyping

| S.No. | Isolates | Identification by MALDI-TOF-MS | Log score value |
| --- | --- | --- | --- |
|  | WGmk1 | NPF | ≤ 0 |
|  | WGmk2 | NRI | 1.672 |
|  | WGmk3 | *Cupriavidus necator* | 1.901B |
|  | WGmk4 | NPF | ≤ 0 |
|  | WGmk5 | NPF | ≤ 0 |
|  | WGtm1 | *Cupriavidus necator* | 2.173A |
|  | WGtm2 | NPF | ≤ 0 |
|  | WGtm3 | NPF | ≤ 0 |
|  | WGtm4 | *Cupriavidus necator* | 2.221A |
|  | WGtm5T | *Cupriavidus necator* | 1.82B |
|  | WGlv1 | NRI | 1.553 |
|  | WGlv2 | NPF | ≤ 0 |
|  | WGlv3T | *Cupriavidus necator* | 1.919B |
|  | WGtg1 | NPF | ≤ 0 |
|  | WGtg2 | NPF | ≤ 0 |
|  | WGtg3 | *Cupriavidus necator* | 2.011A |
|  | WGpn1 | *Cupriavidus necator* | 2.144A |
|  | WGpn2 | *Cupriavidus necator* | 2.107A |
|  | WGpn3 | *Cupriavidus necator* | 2.055A |
|  | SKND1 | *Paraburkholderia caribensis* | 1.831B |
|  | SKND2 | *Paraburkholderia caribensis* | 2.253A |
|  | SKND3 | *Paraburkholderia caribensis* | 2.13A |
|  | SKND4 | *Paraburkholderia caribensis* | 2.215A |
|  | SKND5 | ND | - |
|  | SKND6 | ND | - |
|  | SKND7 | ND | - |
|  | SKND8 | *Paraburkholderia caribensis* | 1.981B |
|  | SKND9 | *Paraburkholderia caribensis* | 2.129A |
|  | SKND10 | ND | - |

Notes: A probable species identification; B Probable genus identification ; NRI= Not reliable identification; NPF= Not peak found; ND= Not done.

Table S3: Blastn results of 16S rRNA gene sequences of isolates.

| **Strain** | **Isolates**  **(location)** | **Sequence’s**  **Length (bp)** | **GenBank**  **(Accession No.)** | **Maximum similarity (%) with other Sequence in GenBank** |
| --- | --- | --- | --- | --- |
| SKND1 | Sukna, West Bengal | 1389 | OK336461 | 100% with *Paraburkholderia caribensis* strain DSM 13236(CP026102) |
| SKND2 | Sukna, West Bengal | 1430 | OK336462 | 99.93% with *Paraburkholderia caribensis* strain DSM 13236(CP026102) |
| SKND3 | Mahananda WL San, West Bengal | 1493 | OK336463 | 99.93% with *Paraburkholderia caribensis* strain DSM 13236(CP026102) |
| SKND4 | Latpanchar, West Bengal | 1458 | OK336464 | 100% with *Paraburkholderia caribensis* strain DSM 13236(CP026102) |
| SKND8 | Kurseong, West Bengal | 1534 | OM281129 | 100% with *Paraburkholderia caribensis* strain DSM 13236(CP026102) |
| SKND9 | Rohini TG, west Bengal | 1189 | OM281130 | 100% with *Paraburkholderia caribensis* strain DSM 13236(CP026102) |
| WGlv3T | Lavasa, Maharashtra | 1536 | OM281131 | 99.35% with *Cupriavidus oxalaticus* strain Ox1(CP069812) |
| WGtm5T | Tamgarh, Maharashtra | 1534 | OM281132 | 99.15% with *Cupriavidus oxalaticus* strain Ox1 (CP069812) |
| WGmk3 | Mukaiwadi, Maharashtra | 1536 | OM281133 | 99.80% with *Herbaspirillum huttiense* strain ATCC 14670 (NR_024698) |

Note: WL= Wildlife; TG= Tea Garden

Table S4: Genomic features, pairwise ANI & dDDH values of the newly isolated rhizobia compared to related strain

| **Strain (GenBank/EMBL GenBank accession number)** | **Genome size (Mbp)** | **Total number of contigs** | **DNA G+C content (mol%)** | **Genome ANI (%)** | | **dDDH relatedness (%)** | |
| --- | --- | --- | --- | --- | --- | --- | --- |
| **WGlv3T** | **WGtm5T** | **WGlv3T** | **WGtm5T** |
| *Cupriavidus gehlotii* WGlv3T (GCF_023952475) | 6.8 | 163 | 67 | 100 | 95.82 | 100 | 64.5 |
| *Cupriavidus mimosae* WGtm5T (GCF_023952485) | 6.7 | 129 | 67 | 95.82 | 100 | 64.5 | 100 |
| “*Cupriavidus neocaledonicus*” STM 6070T (GCF_000372525) | 6.8 | 107 | 67 | 95.11 | 94.86 | 59.6 | 58.5 |
| *Cupriavidus nantongensis* X1T (GCF_001598055) | 7.1 | 5 | 66.5 | 95.15 | 94.59 | 59.4 | 56.3 |
| *Cupriavidus alkaliphilus* ASC-732T (GCF_900094595) | 6.1 | 36 | 68 | 94.80 | 94.38 | 57.6 | 55.5 |
| *Cupriavidus taiwanensis* LMG 19424T (GCF_000069785) | 6.5 | 5 | 67 | 94.30 | 94.20 | 54.7 | 54.7 |
| *Cupriavidus lacunae* S23T (GCF_003353055) | 9.2 | 248 | 65 | 89.62 | 89.52 | 36.5 | 36.3 |
| *Cupriavidus necator* N-1T (GCF_000219215) | 8.5 | 4 | 65.5 | 89.56 | 89.61 | 33.3 | 33.1 |
| *Cupriavidus oxalaticus* NBRC 13593T  (GCF_001592245) | 6.6 | 65 | 67 | 88.92 | 88.88 | 32.7 | 32.5 |
| *Cupriavidus numazuensis* LMG26411T (GCF_905397435) | 9 | 182 | 64.5 | 84.59 | 84.59 | 26 | 25.9 |
| *Cupriavidus cauae* MKL-01T (GCF_008632125) | 5.7 | 75 | 68 | 84.06 | 84.06 | 25.9 | 25.8 |
| *Cupriavidus gilardii* CCUG 38401T (GCF_008801915) | 5.8 | 115 | 67.5 | 83.85 | 83.78 | 25.1 | 25.1 |
| *Cupriavidus malaysiensis* USMAA1020T  (GCF_001854325) | 7.9 | 3 | 68.5 | 83.78 | 83.74 | 25.1 | 25 |
| *Cupriavidus plantarum* LMG 26296T (GCF_905397285) | 6.2 | 27 | 66 | 82.06 | 81.97 | 24.1 | 23.9 |
|  | | | | **SKND8** | | **SKND8** | |
| *Paraburkholderia caribensis* SKND8 (GCF_023952555) | 9.2 | 461 | 62.5 | 100 | | 100 | |
| *Paraburkholderia caribensis* MWAP64T (GCF_001449005) | 9 | 4 | 62.5 | 98.86 | | 91.2 | |
| *Paraburkholderia hospita* LMG 20598T (GCF_900108355) | 11.2 | 195 | 62 | 92.76 | | 49.1 | |
| *Paraburkholderia terrae* NBRC 100964T (GCF_000739835) | 9.9 | 247 | 62 | 92.87 | | 48.7 | |
| *Paraburkholderia phymatum* STM815T (GCF_000020045) | 8.7 | 4 | 62.5 | 88.32 | | 33.8 | |
| *Paraburkholderia sabiae* LMG24235T (GCF_030412785) | 9.9 | 4 | 62 | 88.07 | | 32 | |
| *Paraburkholderia azotifigens* NF2-5-3T (GCF_007995085) | 9.7 | 5 | 62.5 | 87.99 | | 31.8 | |
| *Paraburkholderia diazotrophica* LMG 26031T (GCF_900108945) | 8.7 | 114 | 62.5 | 87.14 | | 30.8 | |
| *Paraburkholderia piptadeniae* STM7183T (GCF_900007165) | 9.7 | 335 | 62.5 | 87.02 | | 30.6 | |
| *Paraburkholderia franconis* CNPSo 3157T (GCF_009362735) | 10 | 259 | 62.5 | 87.08 | | 30.6 | |
|  |  |  |  | **WGmk3** | | **WGmk3** | |
| *Herbaspirillum huttiense* WGmk3 (GCF_023952535) | 5.8 | 184 | 62.5 | 100 | | 100 | |
| *Herbaspirillum huttiense* subsp. putei IAM 15032 T (GCF_000478365) | 5.8 | 32 | 62.5 | 96.91 | | 68.9 | |
| *Herbaspirillum aquaticum* IEH 4430 T (GCF_002213425) | 5.4 | 67 | 62.5 | 93.21 | | 48.4 | |
| *Herbaspirillum rubrisubalbicans* NBRC 102523T (GCF_001591225) | 5.5 | 101 | 61.5 | 88.15 | | 30.9 | |
| *Herbaspirillum camelliae* WT00CT (GCF_001929405) | 6.1 | 11 | 62.5 | 88.10 | | 30.9 | |
| *Herbaspirillum seropedicae* strain Z67T (GCF_022493935) | 5.5 | 10 | 63.5 | 88.09 | | 30.5 | |
| *Herbaspirillum robiniae* HZ10T (GCF_002213415) | 5.5 | 31 | 65 | 85.49 | | 26.4 | |
| *Herbaspirillum chlorophenolicum* NBRC 102525T (GCF_001571165) | 5.3 | 107 | 61 | 84.18 | | 25.3 | |
| *Herbaspirillum hiltneri* N3T (GCF_001267925) | 5 | 1 | 61 | 81.17 | | 22.5 | |
| *Herbaspirillum rhizosphaerae* UMS-37T (GCF_001189965) | 5.3 | 55 | 60 | 81.13 | | 22.2 | |

Figure S2: Phylogenetic tree based on *nifH* gene sequences of *M. pudica* root-nodulating bacteria inferred by using the maximum likelihood method. Bootstrap values (based on 1000 replicates) are indicated at internodes. The scale bars indicate nucleotide substitutions.

Figure S3: Phylogenetic tree based on *nodC* gene sequences of *M pudica* root-nodulating bacteria inferred by using the maximum likelihood method. Bootstrap values (based on 1000 replicates) are indicated at internodes. The scale bars indicate nucleotide substitutions.

Table S5. Balstn search results of *nifH* gene for the rhizobial strains isolated from the root-nodules of *Mimosa pudica*.

| **Strain** | **Top hits on NCBI Blastn search** | **Identity (%)** | **Host** | **Symbiovar** | **Country origin** | **Reference*** |
| --- | --- | --- | --- | --- | --- | --- |
| *Paraburkholderia caribensis* SKND8 | *Paraburkholderia phymatum* STM815 (GCF_000020045) | 99.89% | *Machaerium lunatum* | tropicalis | French Guiana | Paulitsch et al. 2020 |
| *Paraburkholderia phenoliruptrix* BR3459a | 99.55% | *Mimosa flocculosa*, | tropicalis | South America | Oliveira et al. 2012 |
| *Paraburkholderia caribensis* TJ182 (AJ505317) | 99.68% | Mimosa diplotricha | tropicalis | Taiwan | Los Santos et al. 2018 |
| *Paraburkholderia sabiae* Br3407 (AY533867) | 97.56% | *Mimosa caesalpiniaefolia* | tropicalis | South America | Chen et al. 2005 |
| *Cupriaviduas*   *gehlotii* WGlv3T | *Cupriavidus taiwanensis* SWF 66322 (GCF_900250085) | 100% | *Mimosa pudica* | ND* | China | Clerissi et al. 2018 |
| *Cupriavidus neocaledonicus* STM 6160 (GCF_900250125), | 100% | *Mimosa pudica* | ND* | New Caledonia | Clerissi et al. 2018 |
| *Cupriavidus taiwanensis* STM 6041 (GCF_900250105) | 100% | *Mimosa pudica* | ND* | French Guiana | Mishra et al. 2012 |
| *Cupriavidus taiwanensis* SWF66294 (GCF_022406855) | 100% | *Mimosa pudica* | ND* | China | Liu et al. 2020 |
| *Cupriavidus taiwanensis* LMG19424 (GCF_000069785) | 100% | *Mimosa pudica* | ND* | Taiwan | Amadou et al. 2008 |
| *C mimosae* WGtm5T | *Cupriavidus taiwanensis* SWF 66322 (GCF_900250085) | 100% | *Mimosa pudica* | ND* | China | Clerissi et al. 2018 |
| Cupriavidus neocaledonicus STM 6160 (GCF_900250125), | 100% | *Mimosa pudica* | ND* | New Caledonia | Clerissi et al. 2018 |
| *Cupriavidus taiwanensis* STM 6041 (GCF_900250105) | 100% | *Mimosa pudica* | ND* | French Guiana | Mishra et al. 2012 |
| *Cupriavidus taiwanensis* SWF66294 (GCF_022406855) | 100% | *Mimosa pudica* | ND* | China | Liu et al. 2020 |
| *Cupriavidus taiwanensis* LMG19424 (GCF_000069785) | 100% | *Mimosa pudica* | ND* | Taiwan | Amadou et al. 2008 |

***Reference:**

Paulitsch, F., Delamuta, J.R.M., Ribeiro, R.A., da Batista, J.S.S., Hungria, M. (2020) Phylogeny of symbiotic genes reveals symbiovars within legume-nodulating *Paraburkholderia* species. *Syst. Appl. Microbiol.* 43, (6). https://doi.org/ 10.1016/j.syapm.2020.126151 126151.

de Oliveira Cunha, C., Goda Zuleta, L. F., Paula de Almeida, L. G., Prioli Ciapina, L., Lustrino Borges, W., Pitard, R. M., ... & Ribeiro de Vasconcelos, A. T. (2012). Complete genome sequence of *Burkholderia phenoliruptrix* BR3459a (CLA1), a heat-tolerant, nitrogen-fixing symbiont of *Mimosa flocculosa*.

Clerissi, C., Touchon, M., Capela, D., Tang, M., Cruveiller, S., Genthon, C., ... & Rocha, E. P. (2018). Parallels between experimental and natural evolution of legume symbionts. *Nature Communications*, *9*(1), 2264.

Estrada-de Los Santos, P., Palmer, M., Chávez-Ramírez, B., Beukes, C., Steenkamp, E. T., Briscoe, L., ... & James, E. K. (2018). Whole genome analyses suggests that *Burkholderia* sensu lato contains two additional novel genera (*Mycetohabitans* gen. nov., and *Trinickia* gen. nov.): implications for the evolution of diazotrophy and nodulation in the *Burkholderiaceae*. *Genes*, *9*(8), 389.

Liu, X., You, S., Liu, H., Yuan, B., Wang, H., James, E. K., ... & Liu, Z. K. (2020). Diversity and geographic distribution of microsymbionts associated with invasive *Mimosa* species in Southern China. *Frontiers in Microbiology*, 2438.

Mishra, R. P., Tisseyre, P., Melkonian, R., Chaintreuil, C., Miche, L., Klonowska, A., ... & Moulin, L. (2012). Genetic diversity of *Mimosa pudica* rhizobial symbionts in soils of French Guiana: investigating the origin and diversity of *Burkholderia phymatum* and other beta-rhizobia. *FEMS Microbiology Ecology*, *79*(2), 487-503.

Amadou, C., Pascal, G., Mangenot, S., Glew, M., Bontemps, C., Capela, D., ... & Masson-Boivin, C. (2008). Genome sequence of the β-rhizobium *Cupriavidus taiwanensis* and comparative genomics of rhizobia. *Genome Research*, *18*(9), 1472-1483.

Chen, W. M., De Faria, S. M., Straliotto, R., Pitard, R. M., Simoes-Araujo, J. L., Chou, J. H., ... & James, E. K. (2005). Proof that Burkholderia strains form effective symbioses with legumes: a study of novel Mimosa-nodulating strains from South America. *Applied and Environmental Microbiology*, *71*(11), 7461-7471.

Table S6. Balstn search results of *nodC* gene for the rhizobial strains isolated from the root-nodules of *Mimosa pudica*.

| **Strain** | **Top hits on NCBI Blastn search** | **Identity (%)** | **Host** | **Symbiovar** | **Country origin** | **Reference**** |
| --- | --- | --- | --- | --- | --- | --- |
| *Paraburkholderia caribensis* SKND8 | *Paraburkholderia phymatum* STM815 (GCF_000020045) | 100% | *Machaerium lunatum* | tropicalis | French Guiana | Paulitsch et al. 2020 |
| *Paraburkholderia phenoliruptrix* BR3459a | 99.70% | *Mimosa flocculosa*, | ND* | South America | Oliveira et al. 2012 |
| *Paraburkholderia sabiae LMG 24235* | 93.3% | *Mimosa caesalpiniifolia* | ND* | Brazil | Hug et al. 2023 |
| *Cupriaviduas*   *gehlotii* WGlv3 | *Cupriavidus taiwanensis* SWF 66322 (GCF_900250085) | 100% | *Mimosa pudica* | ND* | China | Clerissi et al. 2018 |
| *Cupriavidus neocaledonicus* STM 6160 (GCF_900250125), | 100% | *Mimosa pudica* | ND* | New Caledonia | Clerissi et al. 2018 |
| *Cupriavidus taiwanensis* STM 6041 (GCF_900250105) | 100% | *Mimosa pudica* | ND* | French Guiana | Mishra et al. (2012) |
| *Cupriavidus taiwanensis* SWF66294 (GCF_022406855) | 100% | *Mimosa pudica* | ND* | China | Liu et al. 2020 |
| *Cupriavidus taiwanensis* LMG19424 (GCF_000069785) | 100% | *Mimosa pudica* | ND* | Taiwan | Amadou et al. 2008 |
| *C mimosae* WGtm5 | *Cupriavidus taiwanensis* SWF 66322 (GCF_900250085) | 100% | *Mimosa pudica* | ND* | China | Clerissi et al. 2018 |
| *Cupriavidus neocaledonicus* STM 6160 (GCF_900250125), | 100% | *Mimosa pudica* | ND* | New Caledonia | Clerissi et al. 2018 |
| *Cupriavidus taiwanensis* STM 6041 (GCF_900250105) | 100% | *Mimosa pudica* | ND* | French Guiana | Mishra et al. (2012) |
| *Cupriavidus taiwanensis* SWF66294 (GCF_022406855) | 100% | *Mimosa pudica* | ND* | China | Liu et al. 2020 |
| *Cupriavidus taiwanensis* LMG19424 (GCF_000069785) | 100% | *Mimosa pudica* | ND* | Taiwan | Amadou et al. 2008 |

*ND = not defined

***Reference:**

Paulitsch, F., Delamuta, J.R.M., Ribeiro, R.A., da Batista, J.S.S., Hungria, M. (2020) Phylogeny of symbiotic genes reveals symbiovars within legume-nodulating *Paraburkholderia* species. *Syst. Appl. Microbiol.* 43, (6). https://doi.org/ 10.1016/j.syapm.2020.126151 126151.

Clerissi, C., Touchon, M., Capela, D., Tang, M., Cruveiller, S., Genthon, C., ... & Rocha, E. P. (2018). Parallels between experimental and natural evolution of legume symbionts. *Nature Communications*, *9*(1), 2264.

Estrada-de Los Santos, P., Palmer, M., Chávez-Ramírez, B., Beukes, C., Steenkamp, E. T., Briscoe, L., ... & James, E. K. (2018). Whole genome analyses suggests that *Burkholderia* sensu lato contains two additional novel genera (*Mycetohabitans* gen. nov., and *Trinickia* gen. nov.): implications for the evolution of diazotrophy and nodulation in the *Burkholderiaceae*. *Genes*, *9*(8), 389.

Liu, X., You, S., Liu, H., Yuan, B., Wang, H., James, E. K., ... & Liu, Z. K. (2020). Diversity and geographic distribution of microsymbionts associated with invasive *Mimosa* species in Southern China. *Frontiers in Microbiology*, 2438.

Mishra, R. P., Tisseyre, P., Melkonian, R., Chaintreuil, C., Miche, L., Klonowska, A., ... & Moulin, L. (2012). Genetic diversity of *Mimosa pudica* rhizobial symbionts in soils of French Guiana: investigating the origin and diversity of *Burkholderia phymatum* and other beta-rhizobia. *FEMS Microbiology Ecology*, *79*(2), 487-503.

Amadou, C., Pascal, G., Mangenot, S., Glew, M., Bontemps, C., Capela, D., ... & Masson-Boivin, C. (2008). Genome sequence of the β-rhizobium *Cupriavidus taiwanensis* and comparative genomics of rhizobia. *Genome Research*, *18*(9), 1472-1483.

Chen, W. M., De Faria, S. M., Straliotto, R., Pitard, R. M., Simoes-Araujo, J. L., Chou, J. H., ... & James, E. K. (2005). Proof that Burkholderia strains form effective symbioses with legumes: a study of novel Mimosa-nodulating strains from South America. *Applied and Environmental Microbiology*, *71*(11), 7461-7471.

Hug, S., Heiniger, B., Bolli, K., Paszti, S., Eberl, L., Ahrens, C. H., & Pessi, G. (2023). *Paraburkholderia sabiae* Uses One Type VI Secretion System (T6SS-1) as a powerful weapon against notorious plant pathogens. *Microbiology Spectrum*, *11*(4), e01622-23.
